# Supplementary material for: Effect of Ground Plane Deformation on Electrical Performance of Air Microstrip Antennas
Source: Hindawi journal article supplement (doi:10.1155/2020/4029780), 2020-03-28
Supplement: f1 [file 4029780.f1.zip]

Archive with 11 entries (8 files):
- 4029780.f1/Animation/
- 4029780.f1/Animation/Current distribution/
- 4029780.f1/Animation/Current distribution/w15.avi
- 4029780.f1/Animation/Current distribution/w18.avi
- 4029780.f1/Animation/Current distribution/w30.avi
- 4029780.f1/Animation/Current distribution/w9.avi
- 4029780.f1/Animation/Field distribution/
- 4029780.f1/Animation/Field distribution/w15.avi
- 4029780.f1/Animation/Field distribution/w18.avi
- 4029780.f1/Animation/Field distribution/w30.avi
- 4029780.f1/Animation/Field distribution/w9.avi
